# Supplementary material for: Light alkane interactions on transition metal oxides like zirconia using a combined frequency response and DRIFTS study
Source: Royal Society of Chemistry journal article supplement (doi:10.1039/d5cp02927a), 2026-01-01
Supplement: d5cp02927a1.pdf [file d5cp02927a1.pdf]

## Supplementary Information

### Light Alkane Interactions on Transition Metal Oxides like Zirconia using a combined Frequency Response and DRIFTS study

Rebecca Grün,<sup>\*a</sup> Maja Glorius<sup>a</sup> and Cornelia Breitung<sup>a</sup>

<sup>a</sup>Chair of Thermodynamics, Technische Universität Dresden, 01069 Dresden, Germany.

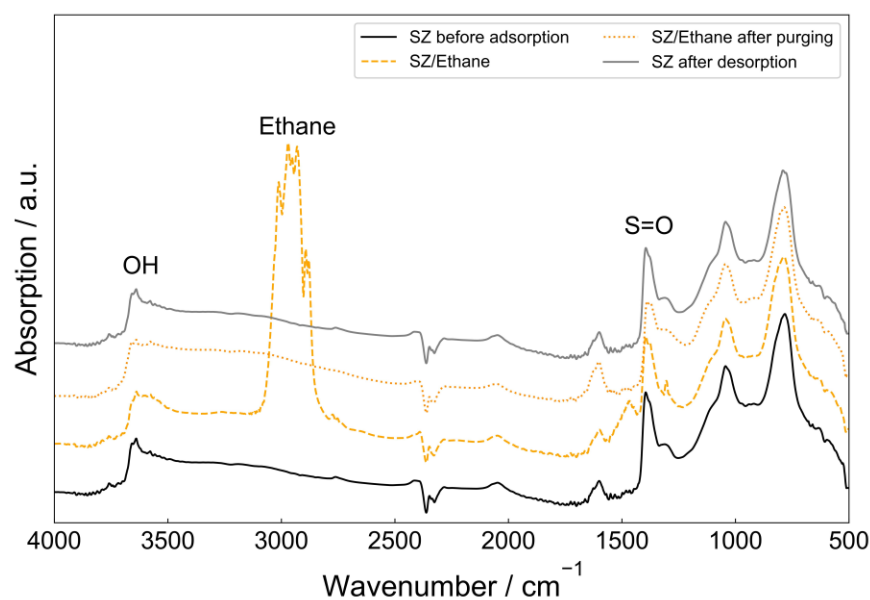

Figure 1: DRIFT spectra of SZ before adsorption, with adsorbed ethane, with adsorbed ethane after purging and after desorption at 35 °C.

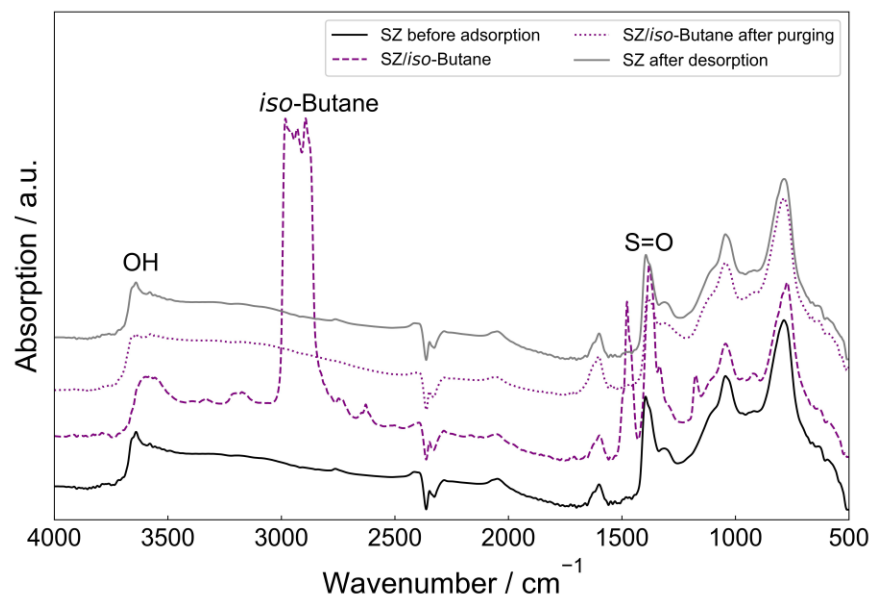

Figure 2: DRIFT spectra of SZ before adsorption, with adsorbed *iso*-butane, with adsorbed *iso*-butane after purging and after desorption at 35 °C.

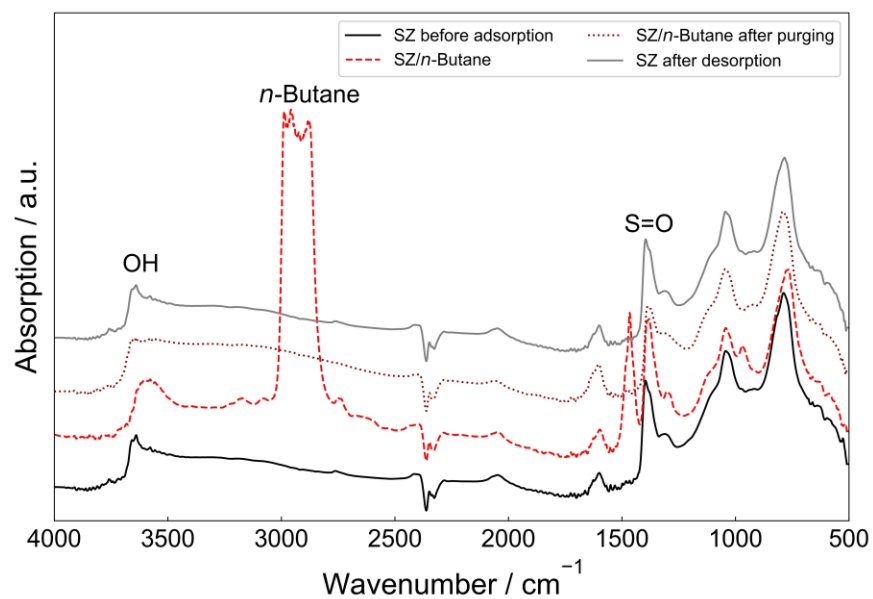

Figure 3: DRIFT spectra of SZ before adsorption, with adsorbed *n*-butane, with adsorbed *n*-butane after purging and after desorption at 35 °C.

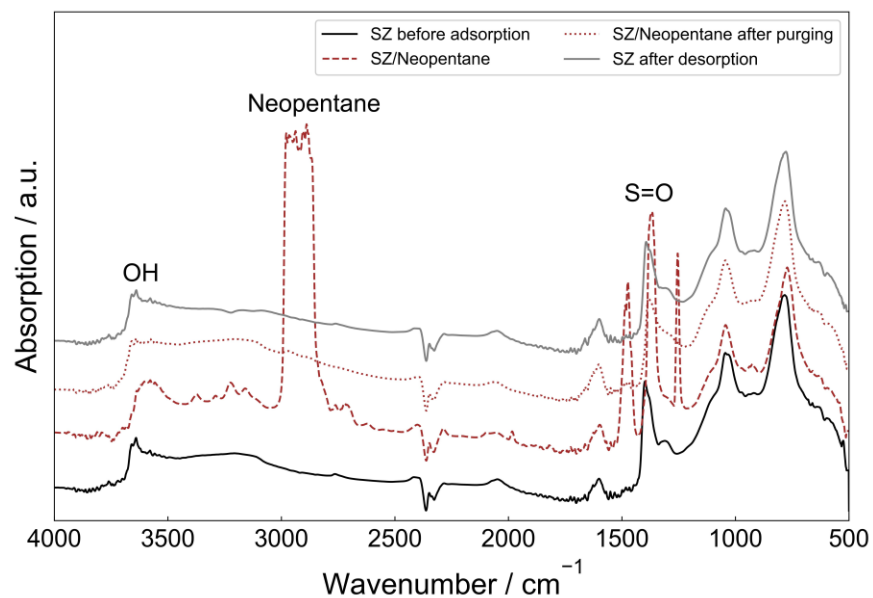

Figure 4: DRIFT spectra of SZ before adsorption, with adsorbed neopentane, with adsorbed neopentane after purging and after desorption at 35 °C.

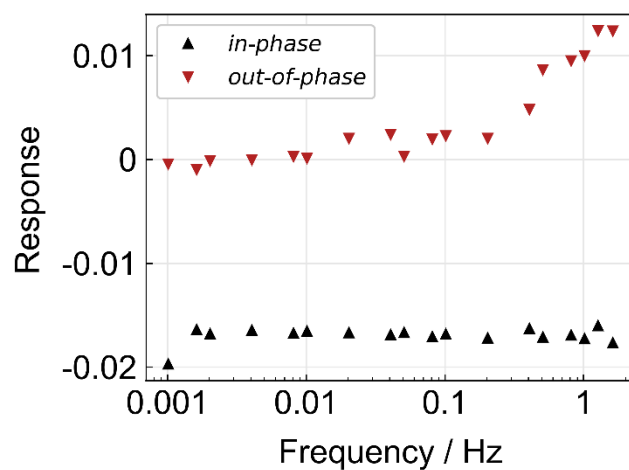

Figure 5: FR spectrum of SZ/argon ( $\vartheta = 35\text{ }^{\circ}\text{C}$ ,  $p = 2,3\text{ kPa}$ ,  $m = 1891\text{ mg}$ )

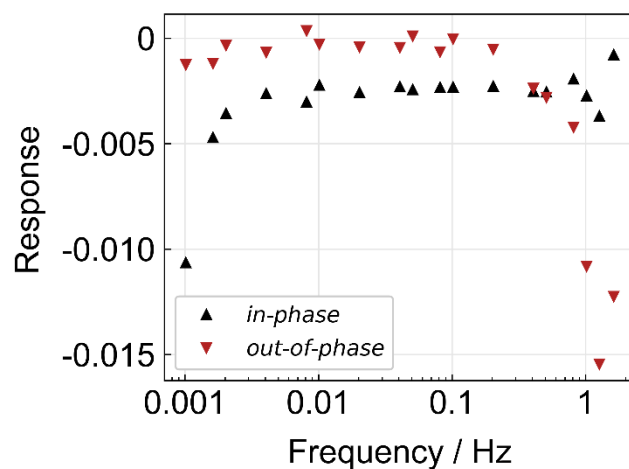

Figure 6: FR spectrum of MCM-41/nitrogen ( $\vartheta = 36\text{ }^{\circ}\text{C}$ ,  $p = 2,4\text{ kPa}$ ,  $m = 315\text{ mg}$ )

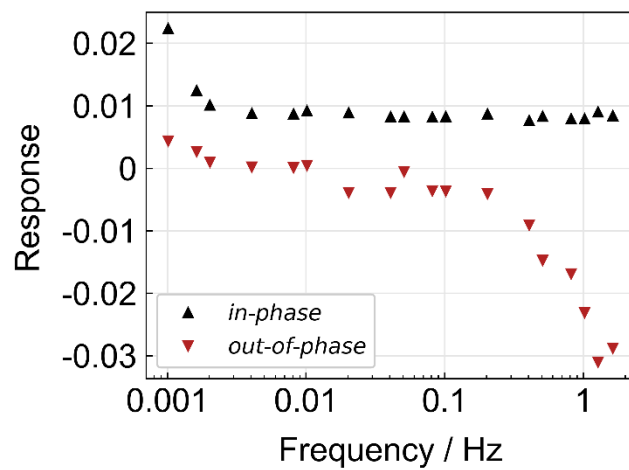

Figure 7: FR spectrum of MCM-41/methane ( $\vartheta = 36\text{ }^{\circ}\text{C}$ ,  $p = 2,4\text{ kPa}$ ,  $m = 315\text{ mg}$ )

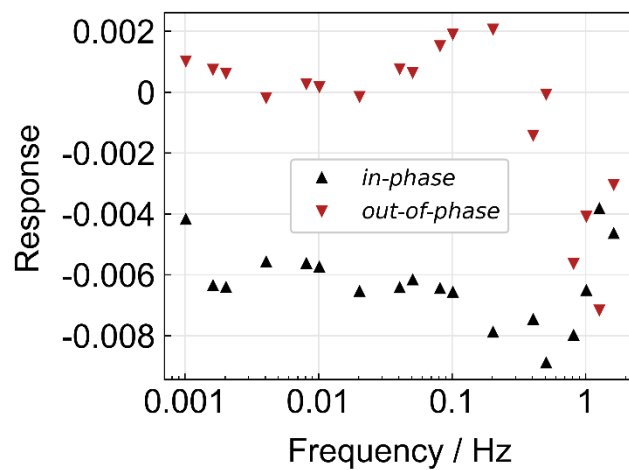

Figure 8: FR spectrum of stainless steel wool/*n*-butane ( $\vartheta = 35\text{ }^{\circ}\text{C}$ ,  $p = 2,3\text{ kPa}$ ,  $m = 356\text{ mg}$ )

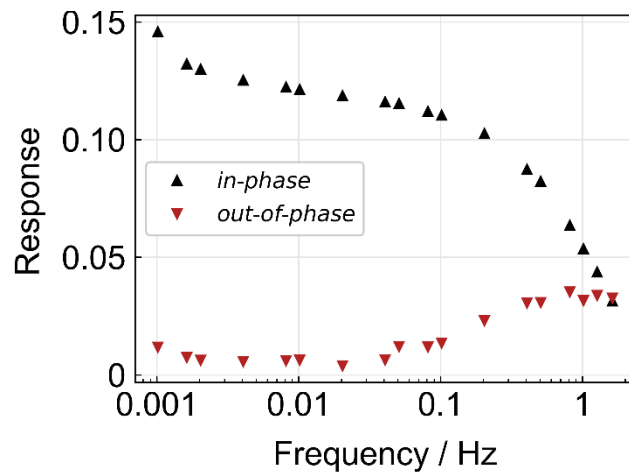

Figure 9: FR spectrum of SZ/propane ( $\vartheta = 36\text{ }^{\circ}\text{C}$ ,  $p = 2,4\text{ kPa}$ ,  $m = 1249\text{ mg}$ )
